# Supplementary material
Source: PubMed Central journal article supplement (PMC6581580)
Supplement: NIHMS1521737-supplement-1.pdf [file NIHMS1521737-supplement-1.pdf]

**Supplementary Table. Baseline demographic and clinical characteristics of local excision cohort**

|                                    | Neoadjuvant<br>chemoradiation<br>(n=695) | Adjuvant<br>chemoradiation only<br>(n=666) | No chemoradiation<br>(n=1,956) | p-value |
|------------------------------------|------------------------------------------|--------------------------------------------|--------------------------------|---------|
| Age, years (median, IQR)           | 63 (16)                                  | 66 (18)                                    | 70 (21)                        | < 0.001 |
| Gender (female)                    | 36.3% (252)                              | 45.9% (306)                                | 45.6% (892)                    | < 0.001 |
| Race                               |                                          |                                            |                                | 0.092   |
| White                              | 89.8% (622)                              | 88.5% (584)                                | 86.5% (1,671)                  |         |
| Black                              | 6.6% (46)                                | 8.6% (57)                                  | 10.0% (194)                    |         |
| Other                              | 3.6% (25)                                | 2.9% (19)                                  | 3.4% (66)                      |         |
| Year of diagnosis,<br>median (IQR) | 2010 (4)                                 | 2010 (4)                                   | 2009 (7)                       | < 0.001 |
| Charlson-Deyo<br>Comorbidity Index |                                          |                                            |                                | < 0.001 |
| 0                                  | 82.4% (573)                              | 78.4% (522)                                | 74.3% (1,453)                  |         |
| 1                                  | 12.4% (86)                               | 16.5% (110)                                | 18.7% (366)                    |         |
| 2+                                 | 5.2% (36)                                | 5.1% (34)                                  | 7.0% (137)                     |         |
| Insurance status                   |                                          |                                            |                                | < 0.001 |
| Private                            | 49.2% (338)                              | 43.7% (287)                                | 35.9% (692)                    |         |
| Government                         | 48.6% (334)                              | 54.3% (357)                                | 61.9% (1,193)                  |         |
| None                               | 2.2% (15)                                | 2.0% (13)                                  | 2.2% (42)                      |         |
| Facility location                  |                                          |                                            |                                | 0.006   |
| Metro                              | 76.9% (513)                              | 80.5% (523)                                | 83.0% (1,571)                  |         |
| Urban                              | 20.4% (136)                              | 17.7% (115)                                | 14.5% (275)                    |         |
| Rural                              | 2.7% (18)                                | 1.8% (12)                                  | 2.4% (46)                      |         |
| Academic/Research<br>Program       | 26.4% (178)                              | 26.8% (174)                                | 32.3% (619)                    | 0.002   |
| Adjuvant therapy                   |                                          |                                            |                                | -       |
| None                               | 82.9% (576)                              | -                                          | 1,956 (100%)                   |         |
| Radiation                          | 0.4% (3)                                 | -                                          | -                              |         |
| Chemotherapy                       | 16.0% (111)                              | -                                          | -                              |         |
| Chemoradiation                     | 0.7% (5)                                 | 100% (666)                                 | -                              |         |
| IQR, interquartile range           |                                          |                                            |                                |         |
